# Supplementary material for: Flavonoid Derivatives as Potential Cholinesterase Inhibitors in Scopolamine-Induced Amnesic Mice: An In Vitro, In Vivo and Integrated Computational Approach
Source: MDPI journal article supplement (doi:10.3390/brainsci12060731), 2022-06-02
Supplement: s1 [file s1]

# Flavonoid Derivatives as Potential Cholinesterase Inhibitors in Scopolamine Induced Amnesic Mice; An *in vitro*, *in-vivo* and Integrated Computational Approach

Fakhria A. Al-Joufi<sup>1</sup>, Syed Wadood Ali Shah<sup>2</sup>, Mohammad Shoaib<sup>2</sup>, Mehreen Ghias<sup>2</sup>, Shafiullah<sup>2</sup>, Atif Ali Khan Khalil<sup>3</sup>, Syed Babar Jamal<sup>3</sup>, Syed Muhammad Hassan Shah<sup>4</sup> and Muhammad Zahoor<sup>5,\*</sup>

<sup>1</sup> Department of Pharmacology, College of Pharmacy, Jouf University, 72341 Aljouf, Saudi Arabia; faaljoufi@ju.edu.sa

<sup>2</sup> Department of Pharmacy, University of Malakand, Dir (Lower), Chakdara 18800, Khyber Pakhtunkhwa, Pakistan; pharmacistsyed@gmail.com (S.W.A.S.); mohammadshoaib13@yahoo.com (M.S.); mehreenghias@yahoo.com (M.G.); shafi\_ullah34@yahoo.com (S.)

<sup>3</sup> Department of Biological Sciences, National University of Medical Sciences, Rawalpindi 46000, Pakistan; atif.ali@numspak.edu.pk (A.A.K.K.); babar.jamal@numspak.edu.pk (S.B.J.)

<sup>4</sup> Department of Pharmacy, Sarhad University of Science and Information Technology, Peshawar, 25000, Khyber Pakhtunkhwa, Pakistan; syedhassan41@gmail.com

<sup>5</sup> Department of Biochemistry, University of Malakand, Dir (Lower), Chakdara 18800, Khyber Pakhtunkhwa, Pakistan

\* Corresponding author: mohammadzahoorus@yahoo.com

## Supplementary file

**Table S1.** Selection of doses for pharmacological investigation using preliminary results in behavioral Y-maze test.

| Treatment/Dose (mg)           |      | Spontaneous alternation performance |
|-------------------------------|------|-------------------------------------|
| Normal control                |      | 81.34±2.01                          |
| Amnesic control (Scopolamine) |      | 36.91±1.75 <sup>###</sup>           |
| F1                            | 2.5  | 37.02±2.11                          |
|                               | 5    | 38.91±1.67                          |
|                               | 7.5  | 49.12±1.45*                         |
|                               | 10   | 48.66±1.98*                         |
|                               | 12.5 | 48.98±2.01*                         |
|                               | 15   | 51.72±1.88**                        |
|                               | 20   | 52.03±2.03**                        |
| F5                            | 2.5  | 38.63±1.78                          |
|                               | 5    | 43.87±1.94                          |
|                               | 7.5  | 66.53±1.89**                        |
|                               | 10   | 66.97±1.72**                        |
|                               | 12.5 | 67.33±2.05***                       |

|  |           |               |
|--|-----------|---------------|
|  | <b>15</b> | 72.94±1.89*** |
|  | <b>20</b> | 73.08±2.12*** |

Mean±SEM (n=8). Statistically analyzed with oneway ANOVA followed by Dunnett's post hoc multiple comparison test to determine the values of P. \*\*\*P<0.001 comparison of amnesic (scopolamine) group *vs.* normal control group. \*P<0.05, \*\*P<0.01 and \*\*\*P<0.001 as comparison treated groups *vs.* amnesic group (scopolamine) using one way ANOVA followed by Dunnett's comparison.
